# Supplementary material for: MiR-146b-5p suppresses the malignancy of GSC/MSC fusion cells by targeting SMARCA5
Source: PubMed Central journal article supplement (PMC7377863; doi:10.18632/aging.103489), 2020-07-06
Supplement: aging-12-103489-s001..pdf [file aging-12-103489-s001..pdf]

## SUPPLEMENTARY FIGURES

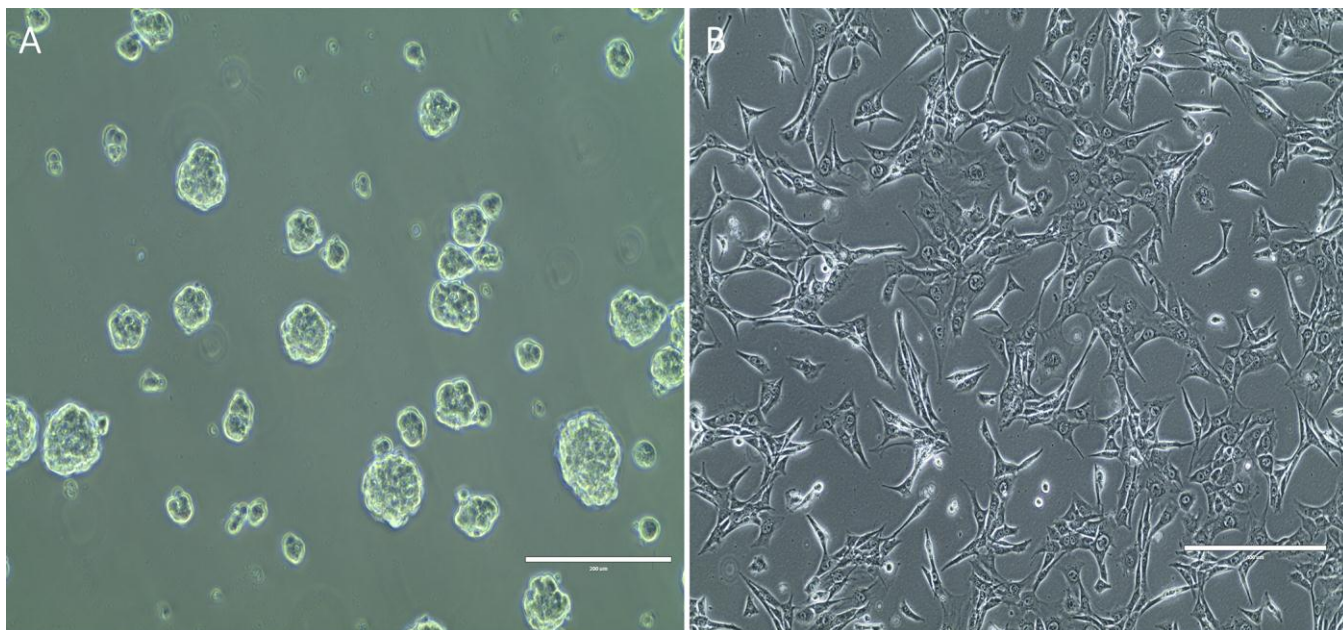

**Supplementary Figure 1. The culture of GSCs-SU4 cells.** Sphere-like cell clusters (A) and adherent growth (B) of GSCs-SU4 cells.

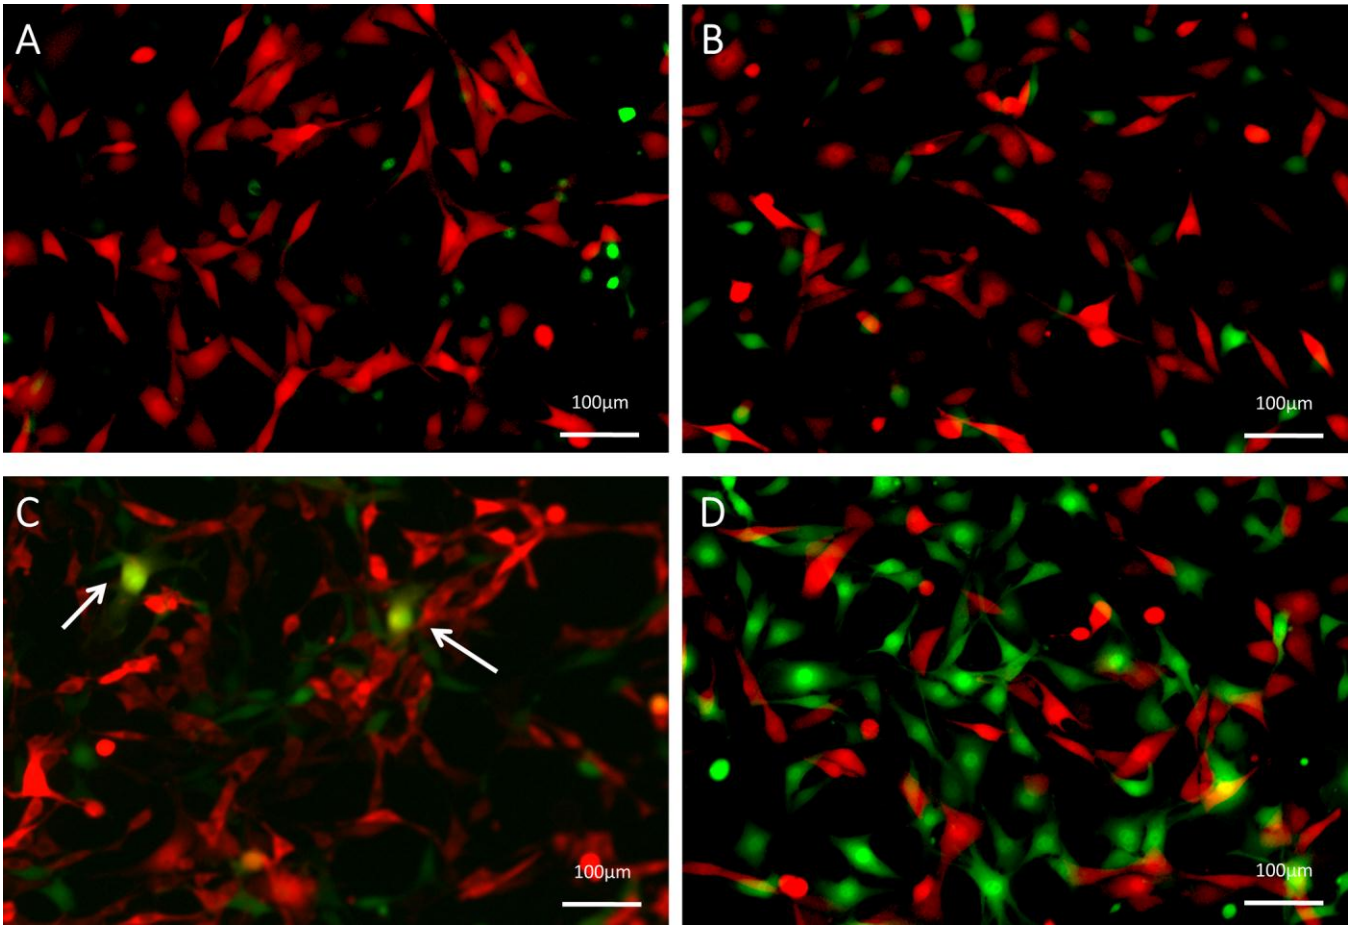

**Supplementary Figure 2. Co-culture of GSCs and MSCs with different cell ratio gradients.** (A) Co-culture of GSCs and MSCs at the ratio of 1:1. (B) Co-culture of GSCs and MSCs at the ratio of 1:10. (C) Co-culture of GSCs and MSCs at the ratio of 1:20 (RFP+/GFP+ cells (arrows)). (D) Co-culture of GSCs and MSCs at the ratio of 1:40.

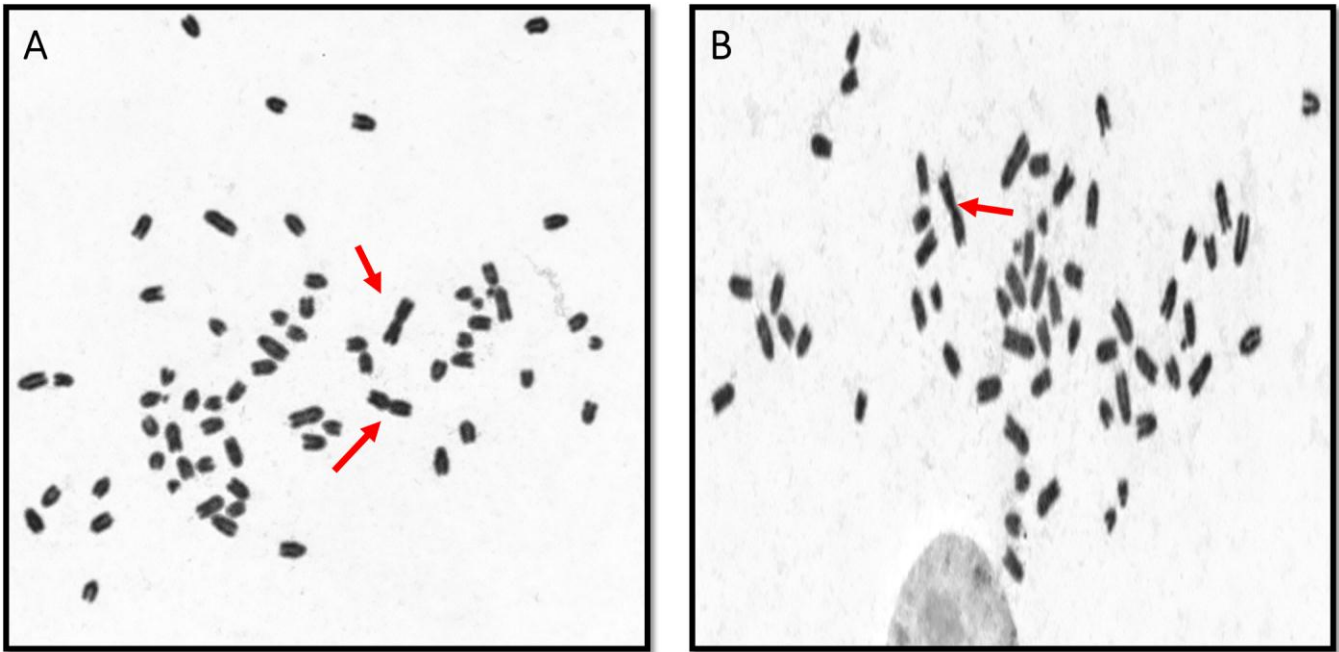

**Supplementary Figure 3. The karyotype of the GSCs/MSCs fusion cells.** (A) Fusion cells are unstable with frequent loss of human chromosomes (arrows). (B) Only one human chromosomes(arrows) were left with subculture of the fusion cells.

**A**

|                |                                 |                                 |
|----------------|---------------------------------|---------------------------------|
| miRNA Name     | <a href="#">hsa-miR-18a-3p</a>  | <a href="#">mmu-miR-18a-3p</a>  |
| miRNA Sequence | ACUGCCCUAAGUGCUCUUCUGG          | ACUGCCCUAAGUGCUCUUCUG           |
| miRNA Name     | <a href="#">hsa-miR-191-3p</a>  | <a href="#">mmu-miR-191-3p</a>  |
| miRNA Sequence | GCUGCGCUUGGAUUUCGUCCCC          | GCUGCACUUGGAUUUCGUUCCC          |
| miRNA Name     | <a href="#">hsa-miR-27b-5p</a>  | <a href="#">mmu-miR-27b-5p</a>  |
| miRNA Sequence | AGAGCUUAGCUGAUUGGUGAAC          | AGAGCUUAGCUGAUUGGUGAAC          |
| miRNA Name     | <a href="#">hsa-miR-26b-3p</a>  | <a href="#">mmu-miR-26b-3p</a>  |
| miRNA Sequence | CCUGUUCUCCAUAUACUUGGCU          | CCUGUUCUCCAUAUACUUGGCUC         |
| miRNA Name     | <a href="#">hsa-miR-532-3p</a>  | <a href="#">mmu-miR-532-3p</a>  |
| miRNA Sequence | CCUCCACACCCAAGGCUUGCA           | CCUCCACACCCAAGGCUUGCA           |
| miRNA Name     | <a href="#">hsa-miR-582-3p</a>  | <a href="#">mmu-miR-582-3p</a>  |
| miRNA Sequence | UAACUGGUUGAACACUGAAC            | UAACUGUUGAACACUGAAC             |
| miRNA Name     | <a href="#">hsa-miR-148a-5p</a> | <a href="#">mmu-miR-148a-5p</a> |
| miRNA Sequence | AAAGUUCUGAGACACUCCGACU          | AAAGUUCUGAGACACUCCGACU          |
| miRNA Name     | <a href="#">hsa-miR-29c-3p</a>  | <a href="#">mmu-miR-29c-3p</a>  |
| miRNA Sequence | UAGCACCAUUUGAAAUCGGUUA          | UAGCACCAUUUGAAAUCGGUUA          |
| miRNA Name     | <a href="#">hsa-miR-15b-5p</a>  | <a href="#">mmu-miR-15b-5p</a>  |
| miRNA Sequence | UAGCAGCAUCAUGGUUUACA            | UAGCAGCAUCAUGGUUUACA            |

**B**

|                |                                 |                                 |
|----------------|---------------------------------|---------------------------------|
| miRNA Name     | <a href="#">hsa-miR-23b-3p</a>  | <a href="#">mmu-miR-23b-3p</a>  |
| miRNA Sequence | AUCACAUUGCCAGGGAUUACCAC         | AUCACAUUGCCAGGGAUUACC           |
| miRNA Name     | <a href="#">hsa-miR-532-5p</a>  | <a href="#">mmu-miR-532-5p</a>  |
| miRNA Sequence | CAUGCCUUGAGUGUAGGACCGU          | CAUGCCUUGAGUGUAGGACCGU          |
| miRNA Name     | <a href="#">hsa-miR-146a-5p</a> | <a href="#">mmu-miR-146a-5p</a> |
| miRNA Sequence | UGAGAACUGAAUCCAUGGGUU           | UGAGAACUGAAUCCAUGGGUU           |
| miRNA Name     | <a href="#">hsa-miR-27b-3p</a>  | <a href="#">mmu-miR-27b-3p</a>  |
| miRNA Sequence | UUCACAGUGGCUAAGUUCUGC           | UUCACAGUGGCUAAGUUCUGC           |
| miRNA Name     | <a href="#">hsa-miR-92a-3p</a>  | <a href="#">mmu-miR-92a-3p</a>  |
| miRNA Sequence | UAUUGCACUUGUCCCGCCUGU           | UAUUGCACUUGUCCCGCCUG            |
| miRNA Name     | <a href="#">hsa-miR-142-5p</a>  | <a href="#">mmu-miR-142-5p</a>  |
| miRNA Sequence | CAUAAAGUAGAAAGCACUACU           | CAUAAAGUAGAAAGCACUACU           |
| miRNA Name     | <a href="#">hsa-miR-26a-5p</a>  | <a href="#">mmu-miR-26a-5p</a>  |
| miRNA Sequence | UUCAAGUAAUCCAGGAUAGGCU          | UUCAAGUAAUCCAGGAUAGGCU          |
| miRNA Name     | <a href="#">hsa-miR-146b-5p</a> | <a href="#">mmu-miR-146b-5p</a> |
| miRNA Sequence | UGAGAACUGAAUCCAUAGGCU           | UGAGAACUGAAUCCAUAGGCU           |
| miRNA Name     | <a href="#">hsa-miR-181a-5p</a> | <a href="#">mmu-miR-181a-5p</a> |
| miRNA Sequence | AACAUUCAACGCUGUCGGUGAGU         | AACAUUCAACGCUGUCGGUGAGU         |

**Supplementary Figure 4. The sequence of these miRNAs is the same between human and mouse.** The most significant differentially expressed miRNAs that sharing between human and mouse can be selected as the candidate miRNAs.

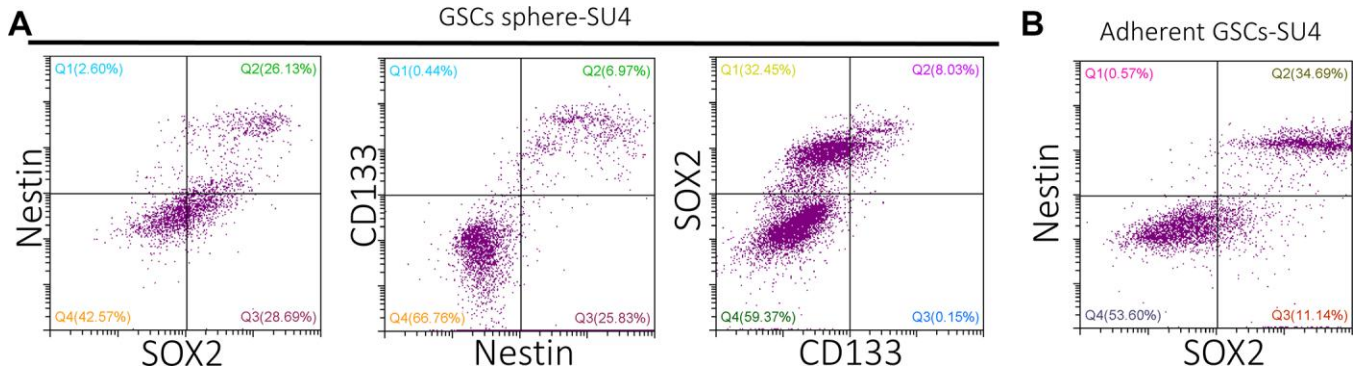

**Supplementary Figure 5. Co-expression of GSCs markers in GSC-SU4 cells by flow cytometry.** There was no significant difference in the proportion of adherent cultured GSCs with positive markers (B), compared with sphere culture (A).
